# Supplementary material for: Australia's aged care service system : the need for an industry strategy
Source: Atypon-hosted journal article supplement (doi:10.1176/appi.ps.001632012), 2002-01-01
Supplement: 541_ds001.pdf [file 541_ds001.pdf]

Appendix, online supplement

**Multifamily Post-Intervention Focus Group Questions**

1. What were some of the problems you were struggling with when you joined this group? What goals did you have for the MFGT?
2. In what ways did you personally benefit from the MFGT? In what ways did the group help you to move towards solving your problems or attaining your goals?
3. What aspects of the MFGT did you find the most helpful? (joining, educational workshop, problem-solving)
4. What aspects of MFGT were the least helpful? (strengths and weaknesses)
5. In what ways have the social connections and support from other members been helpful to you?
6. How would you improve the MFGT experience?
7. How could we do a better job of recruiting families and Veterans to MFGT?
8. Any additional comments, thoughts or recommendations?
9. Looking back, would you do it again?
